# Supplementary material for: Aromatic cage-like B46: existence of the largest decagonal holes in stable atomic clusters
Source: Royal Society of Chemistry journal article supplement (doi:10.1039/c7ra02870a), 2017-01-01
Supplement: c7ra02870a2.pdf [file c7ra02870a2.pdf]

# Aromatic Cage-Like $B_{46}$ : Existence of the Largest Decagonal Holes in Stable Atomic Clusters

Truong Ba Tai\* and Minh Tho Nguyen

*Supplementary Information.* The file contains

- Shapes and relative energies of the low-lying isomers of  $B_{46}$  obtained at the PBE0/6-311+G(d) level (Figure S1)
- Cartesian coordinates of the low-lying isomers  $B_{46}$  (Table S1)

|                                                                                     |                                                                                     |                                                                                      |                                                                                       |
|-------------------------------------------------------------------------------------|-------------------------------------------------------------------------------------|--------------------------------------------------------------------------------------|---------------------------------------------------------------------------------------|
| 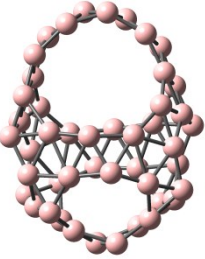   |    |    |    |
| I ( $C_2$ , $^1A$ )<br>0.00                                                         | II ( $C_{2v}$ , $^1A_1$ )<br>- 0.24                                                 | III ( $C_1$ , $^1A$ )<br>0.36                                                        | IV ( $C_s$ , $^1A'$ )<br>0.81                                                         |
|    |    |    |    |
| V ( $C_1$ , $^1A$ )<br>1.07                                                         | VI ( $C_1$ , $^1A$ )<br>1.24                                                        | VII ( $C_1$ , $^1A$ )<br>1.29                                                        | VIII ( $C_2$ , $^1A$ )<br>1.37                                                        |
|   |   |   |   |
| IX ( $C_1$ , $^1A$ )<br>1.40                                                        | X ( $C_s$ , $^1A'$ )<br>1.46                                                        | XI ( $C_s$ , $^1A'$ )<br>1.47                                                        | XII ( $C_1$ , $^1A$ )<br>1.73                                                         |
|  |  |  |  |
| XIII ( $C_s$ , $^1A'$ )<br>1.76                                                     | XIV ( $C_s$ , $^1A'$ )<br>1.77                                                      | XV ( $C_1$ , $^1A$ )<br>1.78                                                         | XVI ( $C_1$ , $^1A$ )<br>1.82                                                         |

**Figure S1** Shapes and relative energies (eV) of the low-lying isomers of  $B_{46}$  obtained at the PBE0/6-311+G(d) level

|                                                                                     |                                                                                     |                                                                                    |                                                                                       |
|-------------------------------------------------------------------------------------|-------------------------------------------------------------------------------------|------------------------------------------------------------------------------------|---------------------------------------------------------------------------------------|
| 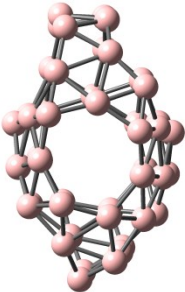   |    |  |    |
| XVII ( $C_1$ , $^1A$ )<br>1.83                                                      | XVIII ( $C_1$ , $^1A$ )<br>1.94                                                     | XIX ( $C_1$ , $^1A$ )<br>2.05                                                      | XX ( $C_1$ , $^1A$ )<br>2.37                                                          |
|    |    |  |    |
| XXI ( $C_1$ , $^1A$ )<br>2.42                                                       | XXII ( $C_1$ , $^1A$ )<br>2.50                                                      | XXIII ( $C_1$ , $^1A$ )<br>2.54                                                    | XXIV ( $C_1$ , $^1A$ )<br>2.88                                                        |
|  |  |                                                                                    |  |
| XXV ( $C_2$ , $^1A$ )<br>3.06                                                       | XXVI ( $C_1$ , $^1A$ )<br>3.06                                                      | XXVII ( $C_1$ , $^1A$ )<br>3.07                                                    |                                                                                       |

**Figure 1 (continued)**

**Table S1** Cartesian coordinates (Å) of the low-lying isomers at the PBE0/6-311+G(d)

| <b>Isomers</b> | <b>XYZ coordinates</b> |             |             |             |
|----------------|------------------------|-------------|-------------|-------------|
| <b>I</b>       | B                      | 3.36435200  | -1.24368100 | 0.60133400  |
|                | B                      | 3.91499500  | 0.32509000  | 0.71996200  |
|                | B                      | 1.68544800  | 1.48832700  | 2.32408300  |
|                | B                      | 1.19265600  | 0.09423000  | 2.90530500  |
|                | B                      | 1.17064700  | -2.87921700 | 1.37282100  |
|                | B                      | -0.37859800 | -2.05964800 | 1.84519300  |
|                | B                      | -0.13879000 | 1.03372700  | 2.40830300  |
|                | B                      | 3.36482100  | 1.24287200  | -0.60085900 |
|                | B                      | 3.03162600  | -1.56983900 | -1.21033400 |
|                | B                      | 1.28159700  | -1.43094100 | 2.30091300  |
|                | B                      | -0.19640500 | -0.63655600 | 2.58708800  |
|                | B                      | 3.03188300  | 1.56926300  | 1.21075500  |
|                | B                      | 3.91509500  | -0.32602300 | -0.71934600 |
|                | B                      | 2.59678700  | -2.17021200 | 1.66495800  |
|                | B                      | -0.26474800 | -3.46834400 | 0.98348800  |
|                | B                      | 2.41052900  | -2.59632400 | 0.10776600  |
|                | B                      | 0.39982000  | 2.55529500  | 1.71569800  |
|                | B                      | 2.01529300  | 2.80221400  | 1.46337500  |
|                | B                      | 2.41126100  | 2.59579000  | -0.10751100 |
|                | B                      | -0.13869200 | -1.03350300 | -2.40861900 |
|                | B                      | -0.19573100 | 0.63675100  | -2.58756900 |
|                | B                      | -3.23401900 | 2.39277200  | -0.64555800 |
|                | B                      | -3.81680100 | -1.76898000 | -0.73942300 |
|                | B                      | -1.18184800 | -2.14379600 | -1.87180300 |
|                | B                      | -3.23514800 | -2.39284000 | 0.64509100  |
|                | B                      | -2.34357600 | 2.39465900  | 0.76279400  |
|                | B                      | 1.28242900  | 1.43058300  | -2.30084600 |
|                | B                      | 1.68558400  | -1.48871400 | -2.32420900 |
|                | B                      | -2.34394900 | -2.39350400 | -0.76283700 |
|                | B                      | -3.81645900 | 1.76984000  | 0.73916700  |
|                | B                      | -0.37777300 | 2.05984500  | -1.84557300 |
|                | B                      | 1.19316100  | -0.09448600 | -2.90555900 |
|                | B                      | -0.74958600 | -2.98868600 | -0.53792400 |
|                | B                      | 0.39948000  | -2.55504200 | -1.71561700 |
|                | B                      | -0.74925600 | 2.98876000  | 0.53793400  |
|                | B                      | -0.26363600 | 3.46829700  | -0.98356300 |
|                | B                      | -1.74406100 | 2.87597100  | -0.96201300 |
| B              | 1.17168000             | 2.87890300  | -1.37275600 |             |
| B              | -1.18186100            | 2.14465100  | 1.87226200  |             |
| B              | -1.74514400            | -2.87561700 | 0.96194700  |             |
| B              | 2.01482500             | -2.80254500 | -1.46321800 |             |
| B              | 2.59767700             | 2.16956100  | -1.66464400 |             |
| B              | -4.33592500            | 1.15224300  | -0.71691600 |             |
| B              | -4.33659400            | -1.15184900 | 0.71660000  |             |
| B              | -4.68181300            | -0.38005900 | -0.73943200 |             |
| B              | -4.68123300            | 0.38076200  | 0.73929500  |             |
| <b>II</b>      | B                      | -2.87786400 | 1.73790600  | -0.35870400 |

|            |   |             |             |             |
|------------|---|-------------|-------------|-------------|
|            | B | -1.44492900 | -2.49962300 | -0.38415800 |
|            | B | 0.00000000  | 3.34962300  | -0.35295000 |
|            | B | -4.28636900 | 0.86218500  | -0.15972400 |
|            | B | -1.44492900 | 2.49962300  | -0.38415800 |
|            | B | -2.89687400 | 0.00000000  | -0.61233700 |
|            | B | -4.26435700 | 2.55239800  | 0.23010600  |
|            | B | 1.44492900  | 2.49962300  | -0.38415800 |
|            | B | 2.87786400  | 1.73790600  | -0.35870400 |
|            | B | -2.84416000 | 3.34208600  | 0.06691600  |
|            | B | -2.87786400 | -1.73790600 | -0.35870400 |
|            | B | -4.26435700 | -2.55239800 | 0.23010600  |
|            | B | 4.28636900  | -0.86218500 | -0.15972400 |
|            | B | -1.42081300 | -0.81497100 | -0.72515100 |
|            | B | -1.42589900 | 4.19389500  | 0.17677900  |
|            | B | 1.42081300  | -0.81497100 | -0.72515100 |
|            | B | 0.00000000  | -1.68686200 | -0.77226000 |
|            | B | -1.42589900 | -4.19389500 | 0.17677900  |
|            | B | 4.28636900  | 0.86218500  | -0.15972400 |
|            | B | -4.28636900 | -0.86218500 | -0.15972400 |
|            | B | -2.84416000 | -3.34208600 | 0.06691600  |
|            | B | 2.87786400  | -1.73790600 | -0.35870400 |
|            | B | 1.44492900  | -2.49962300 | -0.38415800 |
|            | B | 0.00000000  | 1.68686200  | -0.77226000 |
|            | B | 1.42081300  | 0.81497100  | -0.72515100 |
|            | B | 0.00000000  | -3.34962300 | -0.35295000 |
|            | B | -1.42081300 | 0.81497100  | -0.72515100 |
|            | B | 0.00000000  | 4.84119500  | 0.34465900  |
|            | B | 1.42589900  | 4.19389500  | 0.17677900  |
|            | B | 2.84416000  | 3.34208600  | 0.06691600  |
|            | B | 4.26435700  | 2.55239800  | 0.23010600  |
|            | B | 5.63349200  | 1.73403000  | 0.57365600  |
|            | B | 5.63349200  | -1.73403000 | 0.57365600  |
|            | B | 4.26435700  | -2.55239800 | 0.23010600  |
|            | B | 2.84416000  | -3.34208600 | 0.06691600  |
|            | B | 1.42589900  | -4.19389500 | 0.17677900  |
|            | B | 0.00000000  | -4.84119500 | 0.34465900  |
|            | B | 5.61361800  | 0.00000000  | 0.35911800  |
|            | B | 6.82692200  | 0.78554100  | 1.09716500  |
|            | B | 6.82692200  | -0.78554100 | 1.09716500  |
|            | B | -5.63349200 | -1.73403000 | 0.57365600  |
|            | B | -5.61361800 | 0.00000000  | 0.35911800  |
|            | B | -5.63349200 | 1.73403000  | 0.57365600  |
|            | B | 2.89687400  | 0.00000000  | -0.61233700 |
|            | B | -6.82692200 | -0.78554100 | 1.09716500  |
|            | B | -6.82692200 | 0.78554100  | 1.09716500  |
| <b>III</b> | B | -3.97551982 | 3.14250475  | -0.47141192 |
|            | B | -1.20681880 | 4.83723534  | -0.54283497 |
|            | B | -5.17035025 | 2.15681505  | -0.74781390 |
|            | B | 1.71584004  | 3.39377304  | 0.26658602  |
|            | B | -2.51141440 | 2.42676960  | 0.41080007  |
|            | B | 0.25675760  | 4.16019819  | 0.11809602  |

|           |   |             |             |             |
|-----------|---|-------------|-------------|-------------|
|           | B | 1.89968794  | 0.11546915  | 0.70862304  |
|           | B | -2.40674744 | -0.96114434 | 0.78026710  |
|           | B | -5.21628933 | 0.56612603  | -0.56219189 |
|           | B | -0.96625695 | -0.07746251 | 0.60495908  |
|           | B | 0.47902748  | -0.81225867 | 0.65181307  |
|           | B | -5.13794638 | -1.07635893 | -0.53919287 |
|           | B | -2.30000450 | -2.58979328 | 0.62847211  |
|           | B | 0.59571645  | -2.50396461 | 0.79336308  |
|           | B | -2.57355830 | 3.97944356  | -0.26394495 |
|           | B | -1.12152787 | 3.25394940  | 0.28556805  |
|           | B | -2.47435142 | 0.73551162  | 0.69120208  |
|           | B | -3.83269884 | 1.45950883  | -0.07706291 |
|           | B | 0.40175452  | 0.85561528  | 0.94162405  |
|           | B | -2.15194261 | -4.14612920 | 0.02623613  |
|           | B | -3.62267901 | -3.45334705 | -0.19743387 |
|           | B | -4.93202149 | -2.63486381 | -0.57110086 |
|           | B | 3.28364343  | 0.98828694  | 0.37977602  |
|           | B | 3.45338040  | -0.67500296 | 0.61286104  |
|           | B | 2.04753292  | -1.58939777 | 0.76175306  |
|           | B | -0.78828003 | -3.40164341 | 0.63805410  |
|           | B | 3.22424247  | 2.66617291  | 0.35808901  |
|           | B | 1.83696399  | 1.75789711  | 0.69392803  |
|           | B | 3.36397827  | -2.20308402 | -0.17364695 |
|           | B | 2.03045582  | -3.15993078 | 0.07048307  |
|           | B | 0.59549223  | -3.87485062 | -0.26701891 |
|           | B | -0.75293918 | -4.89258539 | -0.32058788 |
|           | B | 0.66552513  | -5.44635758 | -0.79389589 |
|           | B | 2.03050669  | -4.68559479 | -0.80041491 |
|           | B | 3.42530117  | -3.77950599 | -0.83377493 |
|           | B | -3.60326098 | -1.77243704 | -0.09539088 |
|           | B | -1.06665493 | 1.62604444  | 0.76054406  |
|           | B | 0.17867785  | 5.44362614  | -0.96055599 |
|           | B | 1.62555718  | 4.87091198  | -0.64132300 |
|           | B | 3.08927659  | 4.17341682  | -0.45244600 |
|           | B | -3.85398990 | -0.17334518 | 0.26748011  |
|           | B | 4.68538063  | -2.83359226 | -0.92517796 |
|           | B | 4.82157076  | -1.32177218 | -0.45092397 |
|           | B | 4.77745986  | 0.24681880  | 0.00851201  |
|           | B | 4.73697592  | 1.86324877  | -0.17722200 |
|           | B | 4.44454706  | 3.34507860  | -0.59372301 |
| <b>IV</b> | B | -1.37347097 | -3.38396172 | -2.24894896 |
|           | B | -1.51869195 | -2.17510114 | -3.26869228 |
|           | B | -1.63292793 | -0.66279886 | -3.75998142 |
|           | B | -1.74936392 | 0.92342102  | -3.54401852 |
|           | B | -1.75837593 | 2.32546459  | -2.78559973 |
|           | B | -1.30723599 | -4.03057554 | -0.79300833 |
|           | B | -1.30723599 | -4.03057554 | 0.79300833  |
|           | B | -1.37347097 | -3.38396172 | 2.24894896  |
|           | B | -1.51869195 | -2.17510114 | 3.26869228  |
|           | B | -1.63292793 | -0.66279886 | 3.75998142  |
|           | B | -1.74936392 | 0.92342102  | 3.54401852  |

|   |   |             |             |             |
|---|---|-------------|-------------|-------------|
|   | B | -1.75837593 | 2.32546459  | 2.78559973  |
|   | B | -1.61076398 | 3.31199714  | 1.52924384  |
|   | B | -1.48870696 | 3.72162901  | 0.00000000  |
|   | B | -1.61076398 | 3.31199714  | -1.52924384 |
|   | B | 0.19793702  | -3.75719008 | -1.62246115 |
|   | B | 0.10124605  | -2.82015131 | -2.98454562 |
|   | B | -0.04256794 | -1.36509286 | -3.77340380 |
|   | B | -0.17275992 | 0.25026227  | -3.99074688 |
|   | B | -0.24375592 | 1.80754897  | -3.47377900 |
|   | B | 0.24501200  | -4.14674100 | 0.00000000  |
|   | B | 0.19793702  | -3.75719008 | 1.62246115  |
|   | B | 0.10124605  | -2.82015131 | 2.98454562  |
|   | B | -0.04256794 | -1.36509286 | 3.77340380  |
|   | B | -0.17275992 | 0.25026227  | 3.99074688  |
|   | B | -0.24375592 | 1.80754897  | 3.47377900  |
|   | B | -0.21287699 | 3.07502762  | 2.43430072  |
|   | B | -0.02790797 | 3.81184149  | 0.89854614  |
|   | B | -0.02790797 | 3.81184149  | -0.89854614 |
|   | B | -0.21287699 | 3.07502762  | -2.43430072 |
|   | B | 1.66674003  | -3.05603672 | -2.26469873 |
|   | B | 1.56242406  | -1.92806609 | -3.38110009 |
|   | B | 1.42171307  | -0.43302378 | -3.93231125 |
|   | B | 1.31708408  | 1.16659920  | -3.88785834 |
|   | B | 1.24666908  | 2.60752981  | -3.21060853 |
|   | B | 1.73939201  | -3.68223856 | -0.79352109 |
|   | B | 1.73939201  | -3.68223856 | 0.79352109  |
|   | B | 1.66674003  | -3.05603672 | 2.26469873  |
|   | B | 1.56242406  | -1.92806609 | 3.38110009  |
|   | B | 1.42171307  | -0.43302378 | 3.93231125  |
|   | B | 1.31708408  | 1.16659920  | 3.88785834  |
|   | B | 1.24666908  | 2.60752981  | 3.21060853  |
|   | B | 1.33327302  | 3.76897080  | 2.09562414  |
|   | B | 1.68715806  | 4.47264343  | -0.77500546 |
|   | B | 1.33327302  | 3.76897080  | -2.09562414 |
|   | B | 1.68715806  | 4.47264343  | 0.77500546  |
| V | B | 2.81092326  | 1.97248966  | -0.65481803 |
|   | B | 4.11378994  | -0.78640549 | -0.74610405 |
|   | B | 1.50497482  | -1.72977419 | -1.98757202 |
|   | B | 0.91468797  | -0.38808312 | -2.60800501 |
|   | B | 0.25056334  | 2.79001995  | -1.68836600 |
|   | B | -1.07508780 | 1.60602410  | -2.08286498 |
|   | B | -0.35446615 | -1.45461298 | -2.19589900 |
|   | B | 3.73355385  | -1.72279045 | 0.51950595  |
|   | B | 2.30442434  | 2.48930671  | 1.05070597  |
|   | B | 0.69517216  | 1.23516590  | -2.30019201 |
|   | B | -0.59433997 | 0.15039005  | -2.57866899 |
|   | B | 3.05124180  | -1.98169337 | -1.14930704 |
|   | B | 3.54538723  | 1.52079857  | 0.80391196  |
|   | B | 1.80782329  | 2.34188677  | -1.85875002 |
|   | B | -1.30842762 | 3.11132613  | -1.44441598 |
|   | B | 1.48111739  | 3.04928181  | -0.42696901 |

|           |   |             |             |             |
|-----------|---|-------------|-------------|-------------|
|           | B | 0.27467369  | -2.90007705 | -1.44202301 |
|           | B | 1.87432368  | -3.08993523 | -1.16890903 |
|           | B | 2.30345975  | -2.59666829 | 0.36265297  |
|           | B | -0.72718577 | 1.36237606  | 2.25590601  |
|           | B | -0.46403095 | -0.24375097 | 2.72215201  |
|           | B | -3.33727520 | -2.23305864 | 0.94350504  |
|           | B | -4.30251787 | 0.71742647  | 0.55547205  |
|           | B | -1.98768269 | 2.19530820  | 1.66007503  |
|           | B | -3.89344082 | 1.30298742  | -0.91639195 |
|           | B | -2.44685225 | -2.51690374 | -0.51303797 |
|           | B | 1.10650198  | -0.79685815 | 2.24909099  |
|           | B | 0.94541232  | 2.15975887  | 2.08573199  |
|           | B | -3.06190975 | 1.77347833  | 0.53467204  |
|           | B | -3.90569617 | -1.79875658 | -0.52848795 |
|           | B | -0.50858413 | -1.73592397 | 2.14271500  |
|           | B | 0.77888916  | 0.74599589  | 2.78954599  |
|           | B | -1.67810665 | 2.70881217  | 0.12339902  |
|           | B | -0.52384161 | 2.86725204  | 1.38748201  |
|           | B | -0.83712130 | -3.01279693 | -0.11646299 |
|           | B | -0.33291130 | -3.18550399 | 1.43010900  |
|           | B | -1.84371625 | -2.70852281 | 1.30329002  |
|           | B | 1.06795979  | -2.35210515 | 1.54428898  |
|           | B | -1.31889728 | -2.64653687 | -1.65707299 |
|           | B | -2.60015972 | 2.19007528  | -1.29761396 |
|           | B | 0.99093345  | 3.43076486  | 1.08966499  |
|           | B | 2.46118290  | -1.39044030 | 1.56372097  |
|           | B | -4.17249704 | -0.83889655 | 0.82387705  |
|           | B | -4.27822000 | -0.27567053 | -0.79176695 |
|           | B | 3.53225004  | -0.15186143 | 0.77243696  |
|           | B | 4.00372213  | 0.81670152  | -0.56021305 |
| <b>VI</b> | B | 1.39864600  | -0.00178900 | -2.59938700 |
|           | B | 0.02990300  | 0.80180900  | -3.14960900 |
|           | B | -0.40109300 | 3.09341400  | -1.35942300 |
|           | B | 1.11516200  | 3.33873900  | -0.98400100 |
|           | B | 3.40630000  | -0.35443800 | -0.54291400 |
|           | B | 3.43374600  | 0.59247900  | 0.98581500  |
|           | B | 0.17802600  | 3.17204000  | 0.40443300  |
|           | B | -1.40401200 | 0.01163700  | -2.59590200 |
|           | B | 0.98212400  | -1.79498200 | -2.46766300 |
|           | B | 3.63818000  | 1.32387700  | -0.61105000 |
|           | B | 3.10823100  | 2.16478800  | 0.67598800  |
|           | B | -0.98773700 | 1.80547800  | -2.45939900 |
|           | B | -0.03647500 | -0.78871500 | -3.15287400 |
|           | B | 2.63180400  | 0.60276900  | -1.73223200 |
|           | B | 3.51693600  | -1.04377200 | 0.92984700  |
|           | B | 2.38908400  | -1.08502600 | -1.71101600 |
|           | B | -1.51616100 | 2.91108600  | 0.07032400  |
|           | B | -1.93874200 | 2.66689400  | -1.49194600 |
|           | B | -2.39309500 | 1.09045600  | -1.70354800 |
|           | B | -0.17834600 | -3.16871500 | 0.39403200  |
|           | B | -3.10842100 | -2.16604900 | 0.67476300  |



|            |   |             |             |             |
|------------|---|-------------|-------------|-------------|
|            | B | -1.41954900 | 0.04431900  | 3.15752700  |
|            | B | -0.02122200 | -0.83789100 | 3.21001000  |
|            | B | 0.87143600  | -2.79561400 | 1.55854000  |
|            | B | 1.42916400  | -0.05946700 | 3.15784700  |
|            | B | -1.22934700 | 1.59501800  | 2.63244800  |
|            | B | -3.64006000 | -1.32085000 | -0.60838200 |
|            | B | 0.39647400  | -3.08598100 | -1.37143600 |
|            | B | 1.23966500  | -1.60797800 | 2.62712500  |
|            | B | 0.03058700  | 0.82220200  | 3.21392000  |
|            | B | -3.43653900 | -0.59497100 | 0.98974300  |
|            | B | -1.11783200 | -3.33555100 | -0.99238800 |
|            | B | 2.29633900  | -2.05476900 | 1.31490600  |
|            | B | 1.51519700  | -2.91033400 | 0.05658800  |
|            | B | -2.29280500 | 2.04970300  | 1.32739200  |
|            | B | -3.51440400 | 1.04064800  | 0.94114500  |
|            | B | -2.57850500 | 0.43064300  | 2.13068400  |
|            | B | -3.40660400 | 0.35675900  | -0.53480300 |
|            | B | -0.86720200 | 2.79018400  | 1.56986500  |
|            | B | 2.58631100  | -0.44087200 | 2.12699800  |
|            | B | 1.93517300  | -2.66148500 | -1.50575400 |
|            | B | -2.63537600 | -0.59769000 | -1.73010700 |
|            | B | -1.81165500 | -3.12766700 | 0.46002500  |
|            | B | -2.35321400 | -2.21447100 | -0.88821100 |
|            | B | 1.81258600  | 3.12873200  | 0.46631300  |
|            | B | 2.34732300  | 2.21540400  | -0.88423500 |
| <b>VII</b> | B | 4.34628700  | 0.03158300  | 0.57329500  |
|            | B | -0.91290700 | 1.88684400  | -2.00961600 |
|            | B | 1.08357400  | 3.12722500  | 0.53723400  |
|            | B | -2.56812100 | -2.76386100 | -0.54086400 |
|            | B | -0.03407900 | -2.67708100 | 0.81458500  |
|            | B | 2.36372800  | -1.47980900 | -1.54468700 |
|            | B | 0.47097700  | 1.09656300  | 2.55478500  |
|            | B | -3.18907500 | 2.13224800  | 0.49997900  |
|            | B | -0.01963400 | 2.29941200  | 1.59268800  |
|            | B | -0.39060200 | -0.95655000 | -2.17395800 |
|            | B | -1.52133500 | 0.16778800  | -2.08254200 |
|            | B | -4.61455300 | -0.03137700 | -0.53400600 |
|            | B | -1.00603300 | -3.11776600 | -0.63641600 |
|            | B | 3.07069000  | -0.03301200 | 1.65914700  |
|            | B | 0.51289400  | -3.56516800 | -0.53668400 |
|            | B | -3.11182800 | 0.04856000  | -1.58239300 |
|            | B | 1.75436700  | 2.51906000  | -1.09329700 |
|            | B | 0.69488000  | 2.13347800  | -2.24458400 |
|            | B | 0.20029200  | 0.60677100  | -2.41368000 |
|            | B | 3.94168700  | -0.89982500 | -0.89908700 |
|            | B | 1.17972700  | -0.74094000 | -2.29308400 |
|            | B | -3.90029900 | 1.42003200  | -0.77683600 |
|            | B | -2.42621800 | 1.47968300  | -1.69058100 |
|            | B | 0.56263600  | -2.10319600 | -1.41873900 |
|            | B | 1.94993500  | -3.02269500 | -0.82541300 |
|            | B | 1.53456900  | -0.07140100 | 2.30723200  |

|             |   |             |             |             |
|-------------|---|-------------|-------------|-------------|
|             | B | -1.68575900 | 2.50170200  | 1.13045300  |
|             | B | 0.07306900  | 2.86544000  | -0.92777800 |
|             | B | 3.43079700  | -2.39982200 | -0.69147200 |
|             | B | -0.51246100 | 3.42280200  | 0.50399300  |
|             | B | -0.77850800 | -1.86261600 | 2.04949800  |
|             | B | 2.37606600  | -1.46908600 | 1.94246800  |
|             | B | 0.82241500  | -1.80457300 | 2.02050000  |
|             | B | -3.71299400 | 0.56384800  | 0.81915500  |
|             | B | -2.67202900 | 1.32319900  | 1.81606800  |
|             | B | -1.14551800 | 1.13154300  | 2.26885000  |
|             | B | -3.39815900 | -2.23202900 | 0.75068800  |
|             | B | -0.22615500 | -0.36644400 | 2.36751300  |
|             | B | -1.75325500 | -2.40499200 | 0.88012600  |
|             | B | 3.47981600  | -1.44464300 | 0.72085800  |
|             | B | 4.21982000  | 0.75910900  | -0.84510200 |
|             | B | 2.64466000  | 2.81305800  | 0.31387600  |
|             | B | 3.33652000  | 2.12424100  | -0.95977800 |
|             | B | 3.47447900  | 1.37701300  | 0.58447100  |
|             | B | -4.40373700 | -0.99605200 | 0.72388800  |
|             | B | -3.54062500 | -1.38826700 | -0.71075300 |
| <b>VIII</b> | B | -1.42593400 | 2.04024700  | -0.64201300 |
|             | B | 0.19747500  | 2.23022600  | -0.51800500 |
|             | B | -3.02642700 | 1.92449000  | -0.28488100 |
|             | B | -3.76949700 | 0.37092400  | -0.51242700 |
|             | B | -2.06720000 | 0.45575900  | -0.50877000 |
|             | B | -0.44881900 | 0.68172900  | -0.77764500 |
|             | B | -2.84819500 | -1.04429300 | -0.79806000 |
|             | B | 2.10759600  | -0.49687400 | -0.81294100 |
|             | B | 0.46576400  | -0.68070200 | -0.99403100 |
|             | B | 3.64554800  | -0.38053400 | -0.11837300 |
|             | B | 2.69619700  | 0.96831900  | -0.16537500 |
|             | B | 5.06038600  | 2.70152900  | 0.36805300  |
|             | B | 3.45709100  | 2.50717000  | -0.26945000 |
|             | B | 1.75776900  | 2.29261200  | -0.04247800 |
|             | B | 5.96537900  | 1.29872900  | 0.61729500  |
|             | B | 4.36586200  | 1.16430800  | -0.01445000 |
|             | B | 5.31456200  | -0.21544100 | 0.10150300  |
|             | B | -1.88557400 | -2.38687200 | -0.83378500 |
|             | B | -3.27756700 | -2.39481900 | 0.21540500  |
|             | B | -0.22450000 | -2.22121800 | -0.81797900 |
|             | B | 1.36799900  | -2.01111000 | -0.46731500 |
|             | B | 3.00725300  | -1.94527600 | -0.31533900 |
|             | B | 4.45676700  | -1.66343100 | 0.53677800  |
|             | B | 4.05152300  | 3.92408100  | 0.35300600  |
|             | B | 2.49887900  | 3.90635900  | 0.09142100  |
|             | B | 0.84585100  | 3.70664600  | -0.01800600 |
|             | B | -0.75457000 | 3.63469000  | -0.14381700 |
|             | B | -2.38496300 | 3.45826000  | -0.20496400 |
|             | B | -3.93960900 | 3.30323900  | 0.16266200  |
|             | B | -4.33648200 | -1.16717600 | 0.05180200  |
|             | B | -5.13816100 | 0.21596600  | 0.50093900  |

|           |   |             |             |             |
|-----------|---|-------------|-------------|-------------|
|           | B | -4.74685500 | 1.70983900  | -0.29521100 |
|           | B | 3.90164500  | -3.32142700 | 0.23755400  |
|           | B | 2.30697600  | -3.44450700 | -0.05745900 |
|           | B | 0.70976000  | -3.62987500 | -0.36972100 |
|           | B | -0.88795500 | -3.71683500 | -0.47780300 |
|           | B | -2.42546200 | -3.85803800 | 0.07835100  |
|           | B | -5.86835600 | -1.28883600 | 0.84884200  |
|           | B | -4.87618400 | -2.64576400 | 0.78978000  |
|           | B | -3.88563600 | -3.86031100 | 0.67364200  |
|           | B | -5.38725200 | 2.91358400  | 0.69135500  |
|           | B | -6.19823000 | 1.55462200  | 0.77748400  |
|           | B | -6.69737700 | 0.03993800  | 1.00688200  |
|           | B | 5.44288500  | -2.98919800 | 0.56203900  |
|           | B | 6.18648800  | -1.58283900 | 0.79570500  |
|           | B | 6.69115300  | -0.05789100 | 0.99980300  |
| <b>IX</b> | B | 1.26372700  | -2.73199800 | 0.78753000  |
|           | B | -0.74843600 | -3.30324400 | -1.16317300 |
|           | B | -1.32993900 | 2.83503300  | -0.56410700 |
|           | B | 3.04429400  | 1.31852600  | -0.38676800 |
|           | B | -3.07417200 | -0.00104500 | -0.46672000 |
|           | B | 0.52911800  | -2.35976300 | -1.76494400 |
|           | B | -2.88406500 | -1.68914900 | -0.05829000 |
|           | B | 0.74611500  | -3.55049700 | -0.59236900 |
|           | B | 1.20995500  | 3.34690300  | 0.63434100  |
|           | B | 1.99828000  | -1.87880100 | 2.02160600  |
|           | B | 0.41463600  | 0.83873200  | 2.72759500  |
|           | B | 2.86965900  | 0.01664900  | -1.51800400 |
|           | B | 2.68319500  | -1.76392700 | 0.54485500  |
|           | B | 1.93868600  | 0.96801200  | 2.10780700  |
|           | B | -3.37164400 | 1.12924600  | 0.78172500  |
|           | B | -2.79964300 | 1.76956300  | -0.56348900 |
|           | B | -0.27532400 | -0.76164700 | 2.70273200  |
|           | B | -2.43247800 | 1.01618900  | 2.10253000  |
|           | B | 3.41035200  | -0.31159500 | 0.11002000  |
|           | B | -1.98398300 | -0.67749400 | 2.44436700  |
|           | B | -2.20139000 | -2.61624700 | -1.18835500 |
|           | B | 1.50275900  | 0.34723900  | -2.53873000 |
|           | B | 0.74941200  | 1.98347300  | 1.54457100  |
|           | B | -0.44872400 | 2.78834500  | -1.98508200 |
|           | B | 2.35762500  | 2.23850800  | 0.96752300  |
|           | B | 0.86935300  | 1.90203700  | -2.56522300 |
|           | B | -1.15086200 | -2.19183900 | 2.21106600  |
|           | B | -1.23512600 | -0.24990200 | -2.67766500 |
|           | B | 0.44663100  | -2.21972700 | 2.25567500  |
|           | B | 2.03084100  | -2.66603400 | -0.91824700 |
|           | B | -1.97045300 | 2.20306000  | -1.90119700 |
|           | B | 2.31451100  | 1.56963000  | -1.79974800 |
|           | B | 2.78550600  | -0.47969400 | 1.73346300  |
|           | B | -2.48554900 | 0.60235300  | -1.92039000 |
|           | B | -0.84514700 | 1.88911300  | 2.08974800  |
|           | B | 0.05965400  | 0.54655300  | -3.16477900 |

|          |   |             |             |             |
|----------|---|-------------|-------------|-------------|
|          | B | -2.59272200 | -1.95466300 | 1.57755100  |
|          | B | 3.19348400  | -1.50847200 | -1.01280900 |
|          | B | 0.17537800  | 3.45996900  | -0.55230600 |
|          | B | 3.40374300  | 0.96689500  | 1.22742400  |
|          | B | -3.18115600 | -0.49097100 | 1.14527400  |
|          | B | -0.45800600 | 3.01816200  | 0.96953700  |
|          | B | -1.05479600 | -1.93674300 | -2.16796200 |
|          | B | 0.29649500  | -0.99857200 | -2.60149800 |
|          | B | -1.25875400 | 0.63077800  | 3.07840300  |
|          | B | -2.51104400 | -1.04294600 | -1.69349100 |
| <b>X</b> | B | 3.80668700  | -3.31304000 | -0.41917900 |
|          | B | 0.94925000  | -4.90914600 | -0.45825500 |
|          | B | 5.07051100  | -2.40994900 | -0.60284100 |
|          | B | -1.92025900 | -3.33612400 | 0.26104500  |
|          | B | 2.35959600  | -2.53617300 | 0.31646700  |
|          | B | -0.51343100 | -4.12295900 | 0.10518000  |
|          | B | -1.97782600 | 0.00097600  | 0.88495400  |
|          | B | 2.39759400  | 0.85652300  | 0.64231800  |
|          | B | 5.19837100  | -0.81598300 | -0.40976800 |
|          | B | 0.89738000  | -0.00023200 | 0.51600900  |
|          | B | -0.50828300 | 0.88008700  | 0.85127000  |
|          | B | 5.19979800  | 0.81114400  | -0.40738300 |
|          | B | 2.36397500  | 2.53445200  | 0.31757000  |
|          | B | 0.94593100  | 1.67250300  | 0.79370300  |
|          | B | 2.33789400  | -4.11041500 | -0.24394900 |
|          | B | 0.95345900  | -3.34836300 | 0.29287000  |
|          | B | 2.39751000  | -0.85905000 | 0.64406300  |
|          | B | 3.70721500  | -1.62928600 | -0.11540800 |
|          | B | -0.50904600 | -0.87929100 | 0.85059800  |
|          | B | 2.34201100  | 4.10804700  | -0.24487700 |
|          | B | 3.81081200  | 3.30965500  | -0.41763200 |
|          | B | 5.07405200  | 2.40538500  | -0.60002900 |
|          | B | -3.40485600 | -0.82474700 | 0.37777700  |
|          | B | -3.40364000 | 0.82795800  | 0.37733000  |
|          | B | -1.97708400 | 1.65339400  | 0.67610000  |
|          | B | 0.95688500  | 3.34660400  | 0.29088000  |
|          | B | -3.29893100 | -2.44807200 | 0.00897200  |
|          | B | -1.97853400 | -1.65151100 | 0.67539800  |
|          | B | -3.29748400 | 2.45180000  | 0.01139000  |
|          | B | -1.91704000 | 3.33807200  | 0.26056400  |
|          | B | -0.50926800 | 4.12250300  | 0.10377100  |
|          | B | 0.95402500  | 4.90767500  | -0.45907700 |
|          | B | -0.48689000 | 5.53860800  | -0.78519000 |
|          | B | -1.88344600 | 4.88094200  | -0.52266600 |
|          | B | -3.32982400 | 4.05381700  | -0.51346700 |
|          | B | 3.70871100  | 1.62552800  | -0.11600000 |
|          | B | 0.94431800  | -1.67313500 | 0.79505400  |
|          | B | -0.49226800 | -5.53851800 | -0.78451700 |
|          | B | -1.88801900 | -4.87933600 | -0.52256100 |
|          | B | -3.33356600 | -4.05049400 | -0.51406800 |
|          | B | 3.87994000  | -0.00179700 | 0.37096900  |

|           |   |             |             |             |
|-----------|---|-------------|-------------|-------------|
|           | B | -4.62050800 | 3.17128800  | -0.66934300 |
|           | B | -4.80580400 | 1.62400100  | -0.37886200 |
|           | B | -4.76954200 | 0.00231400  | -0.18922600 |
|           | B | -4.80714100 | -1.61896100 | -0.37975100 |
|           | B | -4.62323400 | -3.16669700 | -0.67020400 |
| <b>XI</b> | B | -0.00002400 | 3.46345600  | 1.70490400  |
|           | B | -1.52417300 | 3.01297500  | 1.67131800  |
|           | B | -2.90732500 | 2.21456800  | 1.57913300  |
|           | B | -3.69302800 | 0.87133600  | 1.37876500  |
|           | B | -4.12805900 | -0.71841700 | 1.15157500  |
|           | B | -2.95588000 | -1.83525600 | 1.54760700  |
|           | B | -1.58963000 | -2.56192600 | 1.82642200  |
|           | B | 0.00007900  | -2.72696400 | 1.87692400  |
|           | B | 1.58973400  | -2.56214300 | 1.82629600  |
|           | B | 2.95594400  | -1.83542400 | 1.54743100  |
|           | B | 4.12792500  | -0.71844300 | 1.15166800  |
|           | B | 3.69291300  | 0.87135300  | 1.37886300  |
|           | B | 2.90732000  | 2.21463600  | 1.57917500  |
|           | B | 1.52413600  | 3.01298000  | 1.67135100  |
|           | B | -4.28471600 | 0.47841300  | -0.21417100 |
|           | B | -3.67239200 | 1.97390400  | 0.01154800  |
|           | B | 0.83991200  | 3.64012600  | 0.20444400  |
|           | B | 2.32830800  | 2.96828100  | 0.11762700  |
|           | B | 3.67237500  | 1.97385500  | 0.01162700  |
|           | B | 4.92575700  | -1.00788600 | -0.37304400 |
|           | B | 4.28484000  | 0.47829000  | -0.21391900 |
|           | B | -3.70034600 | -1.99947100 | 0.01155300  |
|           | B | -2.44779100 | -2.99255600 | 0.35512800  |
|           | B | 2.44781200  | -2.99262600 | 0.35488300  |
|           | B | 0.81052000  | -3.35332300 | 0.48299900  |
|           | B | -0.81059700 | -3.35348200 | 0.48319800  |
|           | B | -4.92579600 | -1.00783400 | -0.37303200 |
|           | B | -0.83991800 | 3.64020200  | 0.20442100  |
|           | B | -2.32824000 | 2.96817000  | 0.11751900  |
|           | B | 3.70055200  | -1.99967500 | 0.01132100  |
|           | B | 0.00004800  | 3.65418400  | -1.36515700 |
|           | B | -1.58083700 | 3.45722400  | -1.34411700 |
|           | B | -2.92327000 | 2.58458900  | -1.49079100 |
|           | B | -3.90210000 | 1.35989700  | -1.67697200 |
|           | B | -4.43473600 | -0.16191900 | -1.77758200 |
|           | B | -4.12286300 | -1.77882600 | -1.64478300 |
|           | B | -2.96904200 | -2.86861100 | -1.37488900 |
|           | B | -1.58220800 | -3.56531800 | -1.06985000 |
|           | B | -0.00007300 | -3.82554900 | -0.96013400 |
|           | B | 1.58202500  | -3.56533800 | -1.07021900 |
|           | B | 2.96892500  | -2.86867100 | -1.37497200 |
|           | B | 4.12275200  | -1.77877100 | -1.64497800 |
|           | B | 4.43465200  | -0.16185500 | -1.77754200 |
|           | B | 3.90220900  | 1.35993800  | -1.67678000 |
|           | B | 2.92336300  | 2.58461300  | -1.49069700 |
|           | B | 1.58094200  | 3.45729400  | -1.34407400 |

|             |             |             |             |             |
|-------------|-------------|-------------|-------------|-------------|
| <b>XII</b>  | B           | -1.81387800 | -3.24752900 | 1.28747500  |
|             | B           | -0.24672400 | -3.36023900 | 1.53133600  |
|             | B           | 1.27427900  | -2.92218300 | 1.71329300  |
|             | B           | 2.58857300  | -2.00282400 | 1.82940500  |
|             | B           | 3.52709700  | -0.73239800 | 1.73821700  |
|             | B           | 4.09067900  | 0.82804500  | 1.49885400  |
|             | B           | 2.87581500  | 1.99799300  | 1.58881500  |
|             | B           | 1.47655700  | 2.73798800  | 1.62448400  |
|             | B           | -0.08228400 | 3.11125100  | 1.51723200  |
|             | B           | -1.68381300 | 3.07510100  | 1.46860500  |
|             | B           | -3.16692600 | 2.53190300  | 1.44200000  |
|             | B           | -4.48057300 | 1.60424900  | 1.37309700  |
|             | B           | -4.96178500 | 0.03768700  | 1.26571200  |
|             | B           | -4.32567700 | -1.43164600 | 1.20662500  |
|             | B           | -3.26573400 | -2.59335600 | 1.15054800  |
|             | B           | 3.66247100  | -1.89534800 | 0.44335900  |
|             | B           | 2.30590700  | -2.85258000 | 0.30772700  |
|             | B           | -2.32570100 | -2.83908600 | -0.30481200 |
|             | B           | -3.68875000 | -1.89381700 | -0.44714900 |
|             | B           | -4.43107400 | -0.45422700 | -0.26136100 |
|             | B           | -3.78076700 | 2.00397800  | -0.13183000 |
|             | B           | -5.08798200 | 1.02400000  | -0.10777900 |
|             | B           | 5.10160400  | 1.00065700  | 0.10495100  |
|             | B           | 3.79422600  | 1.98362700  | 0.12607600  |
|             | B           | -0.79484900 | 3.21190000  | -0.04199900 |
|             | B           | 0.81691300  | 3.21269200  | 0.03830700  |
|             | B           | 2.44031900  | 2.85709100  | 0.15856000  |
|             | B           | 4.43824600  | -0.47361100 | 0.27984200  |
|             | B           | -0.83813100 | -3.47345100 | -0.14440000 |
|             | B           | 0.81068800  | -3.45665100 | 0.14113100  |
|             | B           | -2.42214800 | 2.87557600  | -0.16289600 |
|             | B           | -1.29368400 | -2.91885100 | -1.71460400 |
| B           | 0.21976300  | -3.37770200 | -1.53001700 |             |
| B           | 1.78828400  | -3.24497700 | -1.28955900 |             |
| B           | 3.24891700  | -2.60810500 | -1.14515000 |             |
| B           | 4.31391900  | -1.45137200 | -1.20102200 |             |
| B           | 4.97041100  | 0.00921400  | -1.25692300 |             |
| B           | 4.48932900  | 1.57375200  | -1.37497900 |             |
| B           | 3.18169000  | 2.51042300  | -1.44550100 |             |
| B           | 1.70353700  | 3.06554700  | -1.47429700 |             |
| B           | 0.10389900  | 3.10621600  | -1.52135700 |             |
| B           | -1.45856800 | 2.74685200  | -1.62865200 |             |
| B           | -2.85624600 | 2.00835300  | -1.59074400 |             |
| B           | -4.07546800 | 0.84374900  | -1.49501600 |             |
| B           | -3.52693800 | -0.71987100 | -1.73477700 |             |
| B           | -2.61542300 | -2.00801900 | -1.83082700 |             |
| <b>XIII</b> | B           | 1.58384000  | 3.51709200  | 0.05917100  |
|             | B           | -1.58140700 | 3.51753100  | 0.05905800  |
|             | B           | -0.83750300 | 1.37672700  | 2.72936900  |
|             | B           | 0.83718500  | 1.37640300  | 2.72894600  |
|             | B           | 3.53655600  | 1.14351900  | 1.01776100  |

|            |   |             |             |             |
|------------|---|-------------|-------------|-------------|
|            | B | 1.54697200  | -0.18819800 | 2.62987900  |
|            | B | -1.54730600 | -0.18784000 | 2.62966000  |
|            | B | -2.08489900 | 2.43907000  | -1.18705700 |
|            | B | 2.08665500  | 2.43796600  | -1.18704900 |
|            | B | 2.26636200  | 1.43320000  | 1.99392700  |
|            | B | -0.00025700 | 0.01203100  | 3.02538200  |
|            | B | -2.59911700 | 2.38727100  | 0.57248500  |
|            | B | -0.79045300 | 3.42970200  | -1.37800100 |
|            | B | 2.60037500  | 2.38582500  | 0.57322600  |
|            | B | 2.94433600  | -0.24529700 | 1.61533500  |
|            | B | 3.20871300  | 1.20174200  | -0.57445000 |
|            | B | -2.94425200 | -0.24347300 | 1.61471000  |
|            | B | -3.53601200 | 1.14564900  | 1.01729200  |
|            | B | -2.26647500 | 1.43499400  | 1.99402600  |
|            | B | -3.20834100 | 1.20376900  | -0.57508400 |
|            | B | 0.82125200  | -1.57884900 | -2.75935200 |
|            | B | -0.82194400 | -1.57850800 | -2.75961500 |
|            | B | -0.85647200 | -3.60381800 | -0.03694300 |
|            | B | 0.85403100  | -3.60365500 | -0.03720100 |
|            | B | 3.37243600  | -1.77485000 | -0.87697200 |
|            | B | 1.56673700  | -2.74500300 | 1.17902300  |
|            | B | -1.56868800 | -2.74439500 | 1.17867600  |
|            | B | -1.60546500 | -0.09335800 | -2.54519500 |
|            | B | 1.60578600  | -0.09418100 | -2.54477300 |
|            | B | 2.09273400  | -2.75932200 | -0.52857000 |
|            | B | -0.00105300 | -3.17445700 | 1.26170300  |
|            | B | -2.17871600 | -1.79520700 | -1.95236200 |
|            | B | 0.00016900  | -0.17604200 | -2.89114200 |
|            | B | 2.17784200  | -1.79647900 | -1.95179400 |
|            | B | 2.95626000  | -1.70239200 | 0.68781100  |
|            | B | 2.99369200  | -0.26279700 | -1.42785900 |
|            | B | -2.95792200 | -1.70082300 | 0.68725000  |
|            | B | -3.37338100 | -1.77306400 | -0.87752800 |
|            | B | -2.09396400 | -2.75809100 | -0.52906300 |
|            | B | -2.99231000 | -0.26111700 | -1.42726900 |
|            | B | -2.20030300 | -1.57866500 | 2.12763700  |
|            | B | 2.19893400  | -1.57986100 | 2.12827100  |
|            | B | 2.53527000  | 1.15199000  | -2.06956300 |
|            | B | -2.53419100 | 1.15342600  | -2.06984600 |
|            | B | 0.00141400  | 3.82254100  | 0.05409600  |
|            | B | 0.79287700  | 3.42929300  | -1.37800800 |
| <b>XIV</b> | B | -2.86631100 | 2.08234400  | 0.80360800  |
|            | B | -3.78768300 | -1.57940400 | -0.54923200 |
|            | B | -0.42263200 | -1.55537200 | 2.26865800  |
|            | B | -1.33005800 | -2.94880800 | 0.24649600  |
|            | B | -1.20900600 | -0.00046600 | -2.44860500 |
|            | B | 1.77027000  | 1.42186500  | -2.37806900 |
|            | B | -2.44367600 | 2.38183400  | -0.97458500 |
|            | B | 0.36528900  | 2.40278800  | -1.85136900 |
|            | B | 3.79498300  | -0.00177700 | -0.82797700 |
|            | B | 2.59328900  | -1.68440400 | 1.93606000  |

|           |   |             |             |             |
|-----------|---|-------------|-------------|-------------|
|           | B | 3.19013500  | 0.84476000  | 0.55695900  |
|           | B | 0.19228700  | -0.81910300 | -2.60938100 |
|           | B | 1.85167400  | -2.62412400 | -1.20108900 |
|           | B | 1.14280600  | -0.82312200 | 2.35079800  |
|           | B | -0.42130300 | 1.55738600  | 2.26752400  |
|           | B | 1.18139500  | 2.47496500  | 1.77646000  |
|           | B | 3.18929400  | -0.84650600 | 0.55756400  |
|           | B | -0.23815200 | 0.00116500  | 2.73368400  |
|           | B | 1.17940700  | -2.47414200 | 1.77838100  |
|           | B | -0.28215000 | -3.10703400 | 1.56818300  |
|           | B | 2.70137400  | 1.26640900  | -1.00152000 |
|           | B | 1.14388800  | 0.82409500  | 2.35092200  |
|           | B | 2.16869800  | 2.23793700  | 0.33977000  |
|           | B | -3.87627900 | 0.78410300  | 0.87194300  |
|           | B | 2.69982600  | -1.26877000 | -1.00058600 |
|           | B | 0.19308500  | 0.81659000  | -2.60977500 |
|           | B | -1.22697600 | -1.56320700 | -1.96392300 |
|           | B | 0.36283900  | -2.40535600 | -1.84922700 |
|           | B | -1.72972700 | 2.55997200  | 1.84005700  |
|           | B | -1.22562800 | 1.56273500  | -1.96505600 |
|           | B | -1.32726100 | 2.94984400  | 0.24476700  |
|           | B | -3.78597900 | 1.58168800  | -0.55009700 |
|           | B | -0.27964900 | 3.10887300  | 1.56656500  |
|           | B | -1.73185000 | -2.55689800 | 1.84142100  |
|           | B | 1.85390600  | 2.62204000  | -1.20292300 |
|           | B | 1.76900700  | -1.42477000 | -2.37717300 |
|           | B | -2.44623800 | -2.38112000 | -0.97342000 |
|           | B | -1.03642200 | 3.08191700  | -1.35346900 |
|           | B | 2.16636600  | -2.23901800 | 0.34133600  |
|           | B | 2.59454600  | 1.68402800  | 1.93477800  |
|           | B | -1.03967600 | -3.08272600 | -1.35192800 |
|           | B | -2.86801100 | -2.07970700 | 0.80454600  |
|           | B | -4.15479700 | 0.00140100  | -0.57799300 |
|           | B | -3.87722100 | -0.78086700 | 0.87233800  |
|           | B | 2.68141000  | -0.00019400 | 2.00214100  |
|           | B | 2.82091200  | -0.00184500 | -2.23756200 |
| <b>XV</b> | B | -3.43202200 | 0.08130400  | 0.45569800  |
|           | B | -2.55022200 | -2.20890100 | -0.79587400 |
|           | B | -0.95916800 | -1.85958600 | 2.23743300  |
|           | B | -1.16165600 | -3.06683800 | -0.20568500 |
|           | B | -0.83264700 | -0.12487000 | -3.02110900 |
|           | B | 0.51919700  | 2.60578800  | -1.83230000 |
|           | B | -3.22170600 | 0.57063200  | -1.32948300 |
|           | B | -1.09484600 | 2.41074000  | -1.68858600 |
|           | B | 3.07045700  | 1.83056800  | -0.49045500 |
|           | B | 1.96779300  | -1.65987700 | 2.10696300  |
|           | B | 2.03223700  | 1.76938100  | 0.91849800  |
|           | B | 0.72913100  | -0.30563400 | -2.73855300 |
|           | B | 2.44999700  | -1.37142200 | -0.68100200 |
|           | B | 0.56400300  | -0.99415200 | 2.60411100  |
|           | B | -1.56638700 | 1.04379900  | 2.36550500  |



|            |   |             |             |             |
|------------|---|-------------|-------------|-------------|
|            | B | -0.42306100 | 2.44247200  | 2.09214800  |
|            | B | 3.12652400  | -1.12415100 | 0.94706300  |
|            | B | -0.96470900 | -0.40891200 | 2.93141300  |
|            | B | 0.63343000  | -2.54504100 | 1.83809400  |
|            | B | -0.78395800 | -3.24288700 | 1.37459200  |
|            | B | 1.54086800  | 2.57485100  | -0.55410900 |
|            | B | 0.16395000  | 0.70033900  | 2.76892100  |
|            | B | 0.69418100  | 2.81461900  | 0.97337900  |
|            | B | -3.36137700 | -1.56850900 | 0.55101700  |
|            | B | 3.46978200  | 0.34670700  | -1.35880100 |
|            | B | -0.04424900 | 1.24738000  | -2.50734000 |
|            | B | -0.40936000 | -1.57729900 | -2.37213700 |
|            | B | 1.26221700  | -1.67260600 | -1.77365800 |
|            | B | -3.00933300 | 1.15368600  | 1.57914300  |
|            | B | -1.81732100 | 0.95268500  | -2.34001000 |
|            | B | -2.95423800 | 1.67985700  | 0.03228600  |
|            | B | -3.58739000 | -0.92691900 | -0.88172700 |
|            | B | -1.99158500 | 2.38612000  | 1.32245500  |
|            | B | -2.15801800 | -2.46253000 | 1.12568900  |
|            | B | -0.11967800 | 3.36301200  | -0.54701600 |
|            | B | 2.22874800  | -0.30845400 | -2.02778000 |
|            | B | -1.43278400 | -2.73962100 | -1.80048000 |
|            | B | -2.67808700 | 2.07768700  | -1.53402700 |
|            | B | 1.96253500  | -2.50932200 | 0.74213100  |
|            | B | 1.14414700  | 1.86029200  | 2.23653700  |
|            | B | 0.11332000  | -2.92396400 | -1.38590600 |
|            | B | 4.47340400  | -0.44993000 | 0.29065900  |
|            | B | 4.52284600  | 1.00338800  | -0.32324200 |
|            | B | 3.12095100  | 0.55426300  | 0.58801400  |
|            | B | -0.86838300 | 3.47432100  | 0.87684500  |
|            | B | 1.63246800  | -2.89246800 | -0.76931300 |
| <b>XVI</b> | B | -1.71241700 | 2.95175400  | -0.75204700 |
|            | B | -0.32097700 | 2.74708200  | -1.67803600 |
|            | B | -0.93794300 | 0.06885700  | -2.81965500 |
|            | B | -2.29193600 | -0.24638700 | -1.82920800 |
|            | B | -4.29306300 | -0.44233100 | 0.32145000  |
|            | B | -2.72863000 | -2.02404800 | -1.47625900 |
|            | B | 0.16873000  | -1.24634900 | -2.76812400 |
|            | B | 1.11061200  | 3.08853700  | -0.76777300 |
|            | B | -1.51072100 | 2.91798200  | 0.89601200  |
|            | B | -4.03813400 | -1.14091400 | -1.06455600 |
|            | B | -1.31201200 | -1.42900600 | -2.25216600 |
|            | B | 1.16885900  | 2.04611400  | -2.37301800 |
|            | B | -0.30547400 | 3.41292600  | -0.15196200 |
|            | B | -2.83337700 | 2.05381600  | -0.00517000 |
|            | B | -3.03494700 | -1.64653400 | 0.25001100  |
|            | B | -2.40838400 | 1.63979300  | 1.64434500  |
|            | B | 1.79706400  | -0.78176300 | -2.89401100 |
|            | B | 0.82392100  | 0.46100700  | -3.04424100 |
|            | B | 2.44821600  | 2.27113700  | -1.44220500 |
|            | B | 1.27745600  | -0.09388000 | 3.01780900  |

|             |   |             |             |             |
|-------------|---|-------------|-------------|-------------|
|             | B | 2.74695000  | 0.27509300  | 2.27651200  |
|             | B | 2.24383500  | -2.75294000 | 0.79290600  |
|             | B | 0.83280700  | -2.60943700 | 1.68655000  |
|             | B | -0.58760200 | -3.06217700 | 0.68727300  |
|             | B | 1.98476700  | -2.73648100 | -0.87351300 |
|             | B | 2.77916200  | 1.64234100  | 1.29960300  |
|             | B | 0.19808500  | 1.31251500  | 2.93885600  |
|             | B | -0.72290900 | -2.01827200 | 2.22228400  |
|             | B | 0.91206000  | -3.40489000 | 0.22161400  |
|             | B | 3.40214200  | -0.02673400 | 0.85207500  |
|             | B | 1.75774400  | 1.46384500  | 2.61575800  |
|             | B | -0.43873600 | -0.40044900 | 2.99436000  |
|             | B | -1.98223400 | -2.35939400 | 1.29134900  |
|             | B | -1.41044100 | 0.85535200  | 2.77996800  |
|             | B | 2.76014500  | -1.39433400 | -1.62791100 |
|             | B | 3.58896900  | -0.31352100 | -0.72638100 |
|             | B | 3.15367800  | -1.66584900 | 0.04669600  |
|             | B | 3.23028200  | 1.22641200  | -0.34132700 |
|             | B | 1.43527100  | -2.19331400 | -2.27060100 |
|             | B | -1.89137700 | -2.77715500 | -0.28744900 |
|             | B | -0.95936200 | 2.27285700  | 2.22621500  |
|             | B | 2.45217300  | 2.65269200  | 0.09703800  |
|             | B | 0.67241000  | -1.59343300 | 2.93257000  |
|             | B | -0.30266100 | 1.59515500  | -2.84338300 |
|             | B | -3.23946300 | 0.47529800  | -0.68347700 |
|             | B | -3.68253900 | 0.92902200  | 0.88121900  |
| <b>XVII</b> | B | -3.23681500 | 1.79494300  | 0.53370400  |
|             | B | -3.77405000 | -2.01103100 | -0.48008900 |
|             | B | -0.35904500 | -1.31107500 | 2.26683500  |
|             | B | -1.20137300 | -2.93950000 | 0.45878900  |
|             | B | -0.90952700 | -0.26986400 | -2.43206900 |
|             | B | 1.59577900  | 1.79793200  | -2.21821700 |
|             | B | -2.74578700 | 1.98198700  | -1.26115700 |
|             | B | 0.05736300  | 2.43710400  | -1.86657100 |
|             | B | 3.94839600  | 0.97662700  | -0.60654400 |
|             | B | 2.53217800  | -1.16124000 | 1.59051000  |
|             | B | 3.19612000  | 1.71358100  | 0.66884800  |
|             | B | 0.55309300  | -1.01781600 | -2.36035100 |
|             | B | 1.99495300  | -2.99283400 | -0.91343000 |
|             | B | 1.16515200  | -0.45100300 | 2.24727000  |
|             | B | -0.73151500 | 1.73200600  | 2.09208200  |
|             | B | 0.65455700  | 2.86166600  | 1.51419200  |
|             | B | 3.86810000  | -1.54988700 | 0.59030100  |
|             | B | -0.29069700 | 0.26572700  | 2.60714800  |
|             | B | 1.18451500  | -2.10373300 | 1.70280600  |
|             | B | -0.18249300 | -2.92302500 | 1.76710700  |
|             | B | 2.71069200  | 1.92731400  | -1.00139200 |
|             | B | 0.95894100  | 1.29864900  | 2.29730900  |
|             | B | 1.89057100  | 2.91048700  | 0.28606400  |
|             | B | -4.17119500 | 0.47665900  | 0.66344700  |
|             | B | 3.19412800  | -1.77740400 | -1.00145300 |

|              |   |             |             |             |
|--------------|---|-------------|-------------|-------------|
|              | B | 0.40738400  | 0.72597800  | -2.45243200 |
|              | B | -0.96161700 | -1.77212700 | -1.80373400 |
|              | B | 0.49403500  | -2.65492200 | -1.53758100 |
|              | B | -2.19852200 | 2.44043500  | 1.60309000  |
|              | B | -1.23295700 | 1.28377600  | -2.04446400 |
|              | B | -1.80772200 | 2.75705700  | -0.00815900 |
|              | B | -4.04925500 | 1.13160200  | -0.82100100 |
|              | B | -0.87640900 | 3.24162100  | 1.30415100  |
|              | B | -1.65039400 | -2.42091200 | 2.01490900  |
|              | B | 1.49219000  | 3.05170000  | -1.25191000 |
|              | B | 1.90225100  | -1.87717800 | -2.03707700 |
|              | B | -2.31481500 | -2.61250500 | -0.82545800 |
|              | B | -1.45469500 | 2.86249200  | -1.60901900 |
|              | B | 2.47118600  | -2.49485400 | 0.54969000  |
|              | B | 2.14356000  | 2.31470500  | 1.77712000  |
|              | B | -0.90810200 | -3.28856700 | -1.13262000 |
|              | B | -2.84699500 | -2.22863600 | 0.93353100  |
|              | B | -4.27999400 | -0.48106000 | -0.69958300 |
|              | B | -3.99122200 | -1.07424300 | 0.83370000  |
|              | B | 4.28996000  | -0.60787500 | -0.63773100 |
|              | B | 3.47009200  | 0.03724700  | 0.69944100  |
| <b>XVIII</b> | B | 2.54445600  | -1.20605900 | 2.31757900  |
|              | B | 1.02608800  | -1.65578900 | 2.94402800  |
|              | B | 0.45130200  | -3.45915500 | 0.04123800  |
|              | B | 1.95449400  | -2.97249600 | -0.55498900 |
|              | B | 3.89855600  | -0.44073300 | -0.52333400 |
|              | B | 1.83070200  | -1.97336200 | -1.92692900 |
|              | B | -0.86413200 | -2.90937200 | -0.85544400 |
|              | B | -0.06866000 | -0.49334300 | 3.20841600  |
|              | B | 2.79693300  | 0.37302200  | 2.01740200  |
|              | B | 3.10510200  | -1.84920400 | -0.52263400 |
|              | B | 0.62336500  | -2.94447300 | -1.47804400 |
|              | B | -0.40568900 | -1.99574400 | 2.33325000  |
|              | B | 1.47047800  | -0.10403700 | 2.82037700  |
|              | B | 3.23684500  | -0.91271400 | 0.92200200  |
|              | B | 2.76608700  | -0.54401900 | -1.72445000 |
|              | B | 3.41725500  | 0.81496900  | 0.37902200  |
|              | B | -2.14926600 | -2.21512300 | 0.12294900  |
|              | B | -1.93494000 | -2.20179400 | 1.76282800  |
|              | B | -0.76968200 | -3.03058500 | 1.00656500  |
|              | B | -1.72899700 | -0.74006700 | 2.42271800  |
|              | B | 0.05006400  | 3.51090000  | 0.11788600  |
|              | B | -1.40399200 | 3.11708100  | 0.79817300  |
|              | B | -2.28476100 | 0.91739000  | -2.11245800 |
|              | B | -0.80815000 | 1.52133100  | -2.73512700 |
|              | B | 2.21360200  | 2.32950000  | -1.85870100 |
|              | B | 0.40184300  | 0.42977000  | -2.98331400 |
|              | B | -2.50381800 | -0.77495300 | -2.31420700 |
|              | B | -1.21512400 | 2.01999100  | 2.09825100  |
|              | B | 1.40217900  | 2.80555400  | 0.92971800  |
|              | B | 0.63511300  | 2.02224600  | -2.25870500 |

|            |   |             |             |             |
|------------|---|-------------|-------------|-------------|
|            | B | -1.09365700 | -0.06981800 | -2.70466000 |
|            | B | -2.68782900 | 2.14772200  | 0.75605600  |
|            | B | -0.02740400 | 3.00581900  | 1.65618700  |
|            | B | 1.14648000  | 3.12045700  | -0.98991600 |
|            | B | 2.02566000  | 0.84262500  | -2.47372500 |
|            | B | 2.48140500  | 2.14646000  | -0.23866500 |
|            | B | -3.22596700 | -1.26338600 | -0.75685100 |
|            | B | -4.25894900 | -0.03776700 | -0.20619200 |
|            | B | -3.79879500 | 0.12959200  | -1.71872500 |
|            | B | -2.37781000 | 0.76013000  | 1.93247300  |
|            | B | -2.11318900 | -2.18537400 | -1.51932100 |
|            | B | 1.60005400  | -0.68242600 | -2.85338400 |
|            | B | 2.62016700  | 1.86592600  | 1.35011900  |
|            | B | -1.16056400 | 0.69561200  | 2.99837500  |
|            | B | -3.74650900 | 0.94697900  | 0.95450600  |
|            | B | -3.07034700 | 1.13871500  | -0.58034100 |
| <b>XIX</b> | B | -2.42083000 | -2.38340400 | -0.39440300 |
|            | B | -3.63617300 | -1.18682900 | -0.26353600 |
|            | B | -2.32326400 | 0.82156000  | -2.14869700 |
|            | B | -1.50193800 | -0.29095800 | -2.93849300 |
|            | B | 0.15056200  | -2.79207200 | -1.46111000 |
|            | B | 0.94241400  | -1.56997200 | -2.37195700 |
|            | B | -0.53969300 | 1.05057900  | -2.58887800 |
|            | B | -3.20130600 | -0.16958500 | 0.98770200  |
|            | B | -1.67703800 | -2.53213300 | 1.30663000  |
|            | B | -0.79181200 | -1.77253700 | -2.53178300 |
|            | B | 0.08988300  | -0.45727700 | -3.06493200 |
|            | B | -3.22632700 | 0.27928300  | -0.76057000 |
|            | B | -3.10686100 | -1.87103800 | 1.05607500  |
|            | B | -1.54303300 | -2.92761200 | -1.62575300 |
|            | B | 1.88464200  | -2.39913000 | -1.28837900 |
|            | B | -0.83570400 | -3.01880200 | -0.15520600 |
|            | B | -1.35786700 | 2.18285700  | -1.61019100 |
|            | B | -2.98302500 | 1.95389600  | -1.10619900 |
|            | B | -2.95258700 | 1.45712900  | 0.50386500  |
|            | B | 1.10768500  | -0.63593400 | 2.39920800  |
|            | B | 0.42008700  | 0.84528600  | 2.67538400  |
|            | B | 2.35194300  | 3.02495700  | 0.40030000  |
|            | B | 4.22577400  | 0.52468500  | 0.51760500  |
|            | B | 2.50002200  | -1.32016000 | 1.88412600  |
|            | B | 4.14131100  | -0.43416000 | -0.79951300 |
|            | B | 1.37539700  | 2.77041000  | -0.95032900 |
|            | B | -1.23051800 | 0.94784500  | 2.56738500  |
|            | B | -0.36254900 | -1.88300000 | 2.36067900  |
|            | B | 3.62338100  | -1.07602500 | 0.68299300  |
|            | B | 3.01448600  | 2.46357400  | -0.98741900 |
|            | B | -0.07866200 | 2.16659900  | 1.87903600  |
|            | B | -0.45821300 | -0.46235700 | 3.02890900  |
|            | B | 2.32414300  | -2.11022800 | 0.41822100  |
|            | B | 1.22127900  | -2.29016400 | 1.68090800  |
|            | B | -0.30905200 | 2.98074100  | -0.59347000 |

|           |   |             |             |             |
|-----------|---|-------------|-------------|-------------|
|           | B | -0.84146900 | 3.40635800  | 0.94835800  |
|           | B | 0.78506300  | 3.17914200  | 0.74013500  |
|           | B | -1.82081400 | 2.18754800  | 1.54890600  |
|           | B | 0.21357000  | 2.38662000  | -2.04083900 |
|           | B | 3.38293400  | -1.84452500 | -0.84249300 |
|           | B | -0.17410500 | -3.20341200 | 1.40191400  |
|           | B | -2.80095400 | 0.98457700  | 2.06768800  |
|           | B | 3.60910200  | 1.96952400  | 0.49144700  |
|           | B | 3.94520300  | 1.19077300  | -0.97640100 |
|           | B | 0.87673400  | -2.97748600 | 0.05775500  |
|           | B | -2.01181500 | 2.83485800  | -0.10467800 |
| <b>XX</b> | B | -3.36635800 | 0.18556600  | 0.87054800  |
|           | B | -2.32233900 | -3.28028100 | -0.42047600 |
|           | B | 0.80323300  | -1.70513500 | 1.96158600  |
|           | B | 0.96157900  | -3.12906800 | -0.21394400 |
|           | B | -1.01831200 | -0.25672900 | -2.26941000 |
|           | B | 0.50507600  | 2.73509900  | -1.62382900 |
|           | B | -3.43299100 | 0.87176400  | -0.88070700 |
|           | B | -1.11649200 | 2.50305100  | -1.49202600 |
|           | B | 3.35966500  | 1.88539100  | -0.77477400 |
|           | B | 3.33886800  | -0.14899300 | 1.72730800  |
|           | B | 2.50588800  | 2.50666000  | 0.46922400  |
|           | B | 0.64727000  | -0.23387300 | -2.45619700 |
|           | B | 3.05483900  | -1.45420200 | -1.32124700 |
|           | B | 1.74748500  | -0.23485200 | 2.21509500  |
|           | B | -0.90734500 | 0.94302600  | 2.14414300  |
|           | B | -0.07276600 | 2.60164100  | 1.76317200  |
|           | B | 3.46154200  | 0.93573100  | 0.53033100  |
|           | B | 0.12196800  | -0.32108600 | 2.43488200  |
|           | B | 2.59914500  | -1.60723000 | 1.53268700  |
|           | B | 1.70039000  | -2.99289800 | 1.25804800  |
|           | B | 2.04169600  | 2.67567600  | -1.14533000 |
|           | B | 0.78451400  | 1.15488300  | 2.19160100  |
|           | B | 0.90102300  | 3.15392400  | 0.23820100  |
|           | B | -3.85480700 | -1.40025400 | 0.91480100  |
|           | B | 3.22100300  | 0.25397800  | -1.16718600 |
|           | B | -0.23645200 | 1.16313400  | -1.97877800 |
|           | B | -0.31966800 | -1.65648700 | -1.93602800 |
|           | B | 1.42326700  | -1.77764200 | -2.19149400 |
|           | B | -2.52455300 | 1.06148600  | 1.92335400  |
|           | B | -1.92165000 | 1.00401500  | -1.76057800 |
|           | B | -2.66007700 | 1.75758300  | 0.41049800  |
|           | B | -4.01146900 | -0.60356300 | -0.47736500 |
|           | B | -1.70563400 | 2.44305100  | 1.62124400  |
|           | B | 0.10741000  | -3.19356500 | 1.28897400  |
|           | B | -0.44630100 | 3.65899100  | -0.52278600 |
|           | B | 2.25040000  | -0.39788100 | -2.33677200 |
|           | B | -0.68995600 | -3.03277200 | -0.73343600 |
|           | B | -2.92630700 | 2.38921900  | -1.12882100 |
|           | B | 3.18002300  | -0.76733300 | 0.19899500  |
|           | B | 1.48477500  | 2.62284500  | 1.73460100  |

|            |   |             |             |             |
|------------|---|-------------|-------------|-------------|
|            | B | 0.52432500  | -3.06538700 | -1.79399000 |
|            | B | -1.44689600 | -3.41377500 | 0.94429400  |
|            | B | -3.43366400 | -2.14669600 | -0.52069600 |
|            | B | -2.87184000 | -2.63196400 | 1.01045100  |
|            | B | -1.97915400 | 3.30590000  | -0.14820600 |
|            | B | 2.53964600  | -2.36094500 | -0.08996200 |
| <b>XXI</b> | B | -3.24303000 | 0.01456000  | -0.41086100 |
|            | B | -2.87362500 | 1.62986800  | -0.43274700 |
|            | B | -0.53899900 | 2.31694900  | -2.01632100 |
|            | B | -1.43360900 | 1.05963000  | -2.52617400 |
|            | B | -2.08932500 | -2.16624700 | -1.61417500 |
|            | B | -0.29995300 | -1.58337300 | -1.70489200 |
|            | B | 1.01294100  | 1.19988800  | -2.21133100 |
|            | B | -1.94926800 | 2.24173300  | 0.87921900  |
|            | B | -2.78564600 | -0.86432200 | 0.97363000  |
|            | B | -1.55279400 | -0.56605800 | -2.18179300 |
|            | B | -0.01067200 | -0.08844400 | -2.32385000 |
|            | B | -1.66222600 | 2.76224300  | -0.75283100 |
|            | B | -2.98676000 | 0.86108000  | 1.07269400  |
|            | B | -3.26714200 | -1.00566900 | -1.89111100 |
|            | B | -0.87093500 | -3.18685600 | -1.32635500 |
|            | B | -3.21456100 | -1.73009100 | -0.33196500 |
|            | B | 1.04740600  | 2.76467700  | -1.55098300 |
|            | B | -0.29128900 | 3.59662900  | -1.02895800 |
|            | B | -0.67351200 | 3.32702500  | 0.53591300  |
|            | B | 0.06529000  | -1.45628900 | 2.26524800  |
|            | B | 0.74973200  | 0.01658200  | 2.48189500  |
|            | B | 4.03138800  | 0.29878000  | 0.51164800  |
|            | B | 3.18818500  | -2.66759400 | 0.27960300  |
|            | B | 0.60535400  | -2.97269900 | 1.75546700  |
|            | B | 2.30634300  | -2.95825700 | -1.04368900 |
|            | B | 3.30682400  | 1.06205600  | -0.85756900 |
|            | B | -0.15112700 | 1.42981700  | 2.36808300  |
|            | B | -1.81893400 | -1.47554900 | 2.24588600  |
|            | B | 1.60205500  | -3.02536400 | 0.50358000  |
|            | B | 4.09273400  | -0.37115800 | -0.97239900 |
|            | B | 1.56594200  | 1.30280500  | 1.93219100  |
|            | B | -0.88604100 | -0.07694800 | 2.63136500  |
|            | B | -0.26326600 | -2.97811600 | 0.28382100  |
|            | B | -0.99259400 | -2.83017200 | 1.79495800  |
|            | B | 2.31123400  | 2.36264000  | -0.33302900 |
|            | B | 2.12988000  | 2.74321700  | 1.27315300  |
|            | B | 3.07710500  | 1.48581300  | 1.03261500  |
|            | B | 0.60460000  | 2.86443400  | 1.72471400  |
|            | B | 2.42877800  | 1.90531100  | -1.89752800 |
|            | B | 0.69354300  | -2.96729700 | -1.21962700 |
|            | B | -1.96189600 | -2.38337100 | 0.39586600  |
|            | B | -0.97365100 | 2.79480900  | 2.04434200  |
|            | B | 3.98283600  | -1.31796700 | 0.40915900  |
|            | B | 3.49849600  | -1.84697200 | -1.14449700 |
|            | B | -2.57532600 | -0.08263100 | 2.39511100  |

|              |             |             |             |             |
|--------------|-------------|-------------|-------------|-------------|
|              | B           | -2.93448500 | 0.56089700  | -2.01747400 |
| <b>XXII</b>  | B           | 3.09447100  | -1.13403700 | 1.03790900  |
|              | B           | 3.70588700  | 1.35392800  | 0.08027900  |
|              | B           | -0.25150400 | 1.39395800  | 2.44526700  |
|              | B           | 1.37930700  | 2.75881700  | 0.72124600  |
|              | B           | 1.62802000  | 0.45893700  | -2.49632200 |
|              | B           | -0.66447000 | -1.85826200 | -2.25760200 |
|              | B           | 3.39931700  | -1.45015100 | -0.88745900 |
|              | B           | 0.88919000  | -2.29039700 | -1.91990000 |
|              | B           | -3.30454800 | -1.07407900 | -1.37814600 |
|              | B           | -2.70895900 | 0.88749100  | 1.11410800  |
|              | B           | -3.05825400 | -1.90955500 | 0.03938700  |
|              | B           | 0.10523000  | 1.07411900  | -2.33817000 |
|              | B           | -1.42963400 | 2.96455700  | -0.76549600 |
|              | B           | -1.60876400 | 0.46382600  | 2.25045200  |
|              | B           | 0.35654400  | -1.73413100 | 2.20163500  |
|              | B           | -0.80499800 | -2.86399000 | 1.47810700  |
|              | B           | -3.82118200 | 1.39466700  | -0.11507400 |
|              | B           | -0.22033100 | -0.27375600 | 2.64137100  |
|              | B           | -1.65198800 | 2.08215300  | 1.67522000  |
|              | B           | -0.05708500 | 2.84920500  | 1.53453800  |
|              | B           | -1.98601700 | -2.09140300 | -1.33395000 |
|              | B           | -1.35785900 | -1.39204200 | 2.38805900  |
|              | B           | -1.72569900 | -3.03383500 | 0.15481500  |
|              | B           | 3.55866100  | 0.35897500  | 1.34512700  |
|              | B           | -2.64685400 | 1.84827000  | -1.25481600 |
|              | B           | 0.43550000  | -0.66933600 | -2.47812200 |
|              | B           | 1.56348700  | 1.87405300  | -1.68391600 |
|              | B           | 0.04760500  | 2.56560300  | -1.42751200 |
|              | B           | 1.92290500  | -1.98227800 | 1.73900900  |
|              | B           | 2.05481000  | -1.00222300 | -1.97632000 |
|              | B           | 2.24797200  | -2.37467600 | 0.19445400  |
|              | B           | 4.06820100  | -0.26705200 | -0.04173400 |
|              | B           | 0.89417200  | -3.04240900 | 1.05630400  |
| B            | 1.24359900  | 2.05106100  | 2.17475200  |             |
| B            | -0.52689200 | -3.07659500 | -1.20605500 |             |
| B            | -1.28451800 | 1.93599100  | -2.09622300 |             |
| B            | 2.65921700  | 2.43779400  | -0.39264000 |             |
| B            | 2.41602000  | -2.55637800 | -1.44942600 |             |
| B            | -2.70996900 | 2.45522900  | 0.43835300  |             |
| B            | -2.35900500 | -2.24983300 | 1.47230700  |             |
| B            | 1.39736100  | 3.38355500  | -0.85907600 |             |
| B            | 2.58228500  | 1.71446400  | 1.33353300  |             |
| B            | -3.44076500 | -0.24060700 | 0.05232600  |             |
| B            | -3.72827300 | 0.45894500  | -1.43839200 |             |
| B            | -0.05205200 | 3.61318000  | 0.00287800  |             |
| B            | -0.25014100 | -3.81175800 | 0.22491600  |             |
| <b>XXIII</b> | B           | -0.11181300 | 1.50595000  | -2.59811100 |
|              | B           | 1.69165400  | 3.18145200  | -1.19310500 |
|              | B           | 2.58532700  | -0.95298700 | -1.41876100 |
|              | B           | 3.24296600  | 1.15693000  | 0.02576500  |

|             |   |             |             |             |
|-------------|---|-------------|-------------|-------------|
|             | B | -0.15258400 | 2.97907700  | 1.85193600  |
|             | B | -3.43959900 | 0.51324600  | 1.50852800  |
|             | B | -1.37655300 | 2.49143100  | -1.72090100 |
|             | B | -3.25120200 | 1.13620600  | -0.02575400 |
|             | B | -1.21302600 | -1.51688800 | 2.07980700  |
|             | B | 2.22706800  | -3.11443500 | 0.51255300  |
|             | B | -2.03739800 | -2.53671500 | 1.03015400  |
|             | B | 0.10136300  | 1.50775200  | 2.59676700  |
|             | B | 1.86386300  | -0.72012600 | 2.51784600  |
|             | B | 2.05367000  | -2.52473200 | -1.02764100 |
|             | B | -0.46007700 | -1.76113900 | -2.33504000 |
|             | B | -2.22075200 | -2.05674700 | -1.70894100 |
|             | B | -0.52859900 | -2.92797700 | 1.65300600  |
|             | B | 1.22556400  | -1.51250800 | -2.08137900 |
|             | B | 3.10517900  | -1.80079200 | 0.14106200  |
|             | B | 3.80023500  | -0.41161500 | -0.30762100 |
|             | B | -2.57855800 | -0.96813300 | 1.41913000  |
|             | B | 0.54843400  | -2.92625100 | -1.65247600 |
|             | B | -3.09311600 | -1.82031600 | -0.14037400 |
|             | B | 1.36852400  | 2.04521600  | -2.30236400 |
|             | B | 0.47288600  | -1.75804300 | 2.33643500  |
|             | B | -2.80168800 | 1.99965700  | 1.48416800  |
|             | B | 1.36001900  | 2.50124900  | 1.72010000  |
|             | B | 1.72533100  | 0.91065000  | 2.40128000  |
|             | B | -0.41069000 | -0.09609600 | -2.68990400 |
|             | B | -2.31393000 | 2.61855900  | -0.19053400 |
|             | B | -1.73242100 | 0.89828800  | -2.40082900 |
|             | B | 0.13309200  | 2.97829500  | -1.85253600 |
|             | B | -1.85992700 | -0.73388200 | -2.51875100 |
|             | B | 3.43593200  | 0.53458500  | -1.50837300 |
|             | B | -3.79753100 | -0.43582100 | 0.30773100  |
|             | B | 0.40912800  | -0.09300600 | 2.68809500  |
|             | B | 2.29690200  | 2.63355900  | 0.18950900  |
|             | B | -2.79041500 | 1.72753000  | -1.45978200 |
|             | B | 2.23432500  | -2.04132700 | 1.70980400  |
|             | B | -2.20545400 | -3.12793300 | -0.51015500 |
|             | B | 2.77830000  | 1.74562200  | 1.45918400  |
|             | B | 2.78855500  | 2.01695100  | -1.48518200 |
|             | B | -1.38223800 | 2.03821500  | 2.30206100  |
|             | B | -1.71233300 | 3.17135800  | 1.19193600  |
|             | B | -0.98027800 | -3.23018300 | -1.54783200 |
|             | B | 1.00186700  | -3.22412500 | 1.54949000  |
| <b>XXIV</b> | B | -3.85327400 | 0.21249700  | -1.25504500 |
|             | B | 1.06048300  | 2.48229600  | 1.46813100  |
|             | B | -0.59267400 | 2.74165100  | -1.34218800 |
|             | B | 2.75326500  | -2.14825500 | 1.07121100  |
|             | B | 0.25521000  | -3.07243600 | 0.06137900  |
|             | B | -2.19876400 | -0.16250100 | 2.24862000  |
|             | B | -0.48879300 | -0.07164400 | -2.42960800 |
|             | B | 3.53530000  | 0.97360200  | -1.51001700 |
|             | B | 0.29423100  | 1.35971300  | -2.07370800 |



|            |   |             |             |             |
|------------|---|-------------|-------------|-------------|
|            | B | 0.49152600  | 0.11363500  | 2.74171700  |
|            | B | 1.83277300  | 1.12986600  | 2.29300600  |
|            | B | 3.53316900  | -0.70291600 | 0.74381200  |
|            | B | 1.17277100  | -2.33024000 | 1.34581200  |
|            | B | -3.08060900 | -1.19657200 | -1.18143500 |
|            | B | -0.39243800 | -2.89130600 | 1.60023500  |
|            | B | 3.25864900  | 0.61841600  | 1.61464400  |
|            | B | -1.49120200 | 2.95819400  | 0.16277500  |
|            | B | -0.72525100 | 2.29443200  | 1.51779100  |
|            | B | 0.30478000  | 1.72142800  | 2.72442700  |
|            | B | -3.50468500 | -0.30872600 | 0.37135800  |
|            | B | -1.10020000 | 0.99377800  | 2.48597100  |
|            | B | 3.75497300  | 0.85458100  | 0.09548800  |
|            | B | 2.61138600  | 1.95612300  | 0.94345700  |
|            | B | 0.09152800  | -1.38246000 | 2.22240700  |
|            | B | -1.56516100 | -1.69198700 | 1.60851400  |
|            | B | -1.47684600 | -1.18284100 | -1.77860500 |
|            | B | 1.96351600  | 1.35111300  | -1.94673700 |
|            | B | 0.12334100  | 3.14061500  | 0.24187500  |
|            | B | -3.20667500 | -1.22399100 | 1.75864800  |
|            | B | 1.09176700  | 2.61709500  | -1.35836800 |
|            | B | 0.84707300  | -2.96476300 | -1.46532400 |
|            | B | -2.35198700 | -2.65775100 | -1.06789300 |
|            | B | -0.75801200 | -2.81385500 | -1.32944200 |
|            | B | 3.64638200  | -0.62146000 | -1.02854300 |
|            | B | 2.75459900  | -0.09710700 | -2.36009800 |
|            | B | 1.16325400  | -0.14907900 | -2.53872800 |
|            | B | 3.50582500  | -2.03060900 | -0.30359800 |
|            | B | 0.17902900  | -1.51751200 | -2.05325200 |
|            | B | 1.90003300  | -2.64506900 | -0.30151000 |
|            | B | -2.90147600 | -2.00851700 | 0.37731100  |
|            | B | -3.99085400 | 1.24202000  | 0.02424700  |
|            | B | -2.18780100 | 2.73004000  | -1.44359400 |
|            | B | -3.08148600 | 2.52841300  | -0.03973800 |
|            | B | -3.46149800 | 1.75591900  | -1.46047600 |
|            | B | 1.77254000  | 3.08206500  | 0.13792600  |
|            | B | -1.48771900 | -2.98589800 | 0.40714600  |
| <b>XXV</b> | B | 4.01719200  | 0.08922600  | 0.39249400  |
|            | B | 2.12168400  | 2.84449200  | 0.95874400  |
|            | B | -0.39596200 | 1.93484400  | 2.21848600  |
|            | B | 0.18495000  | 0.74967800  | 3.16596600  |
|            | B | 1.85758400  | -1.51997400 | 1.36487400  |
|            | B | 0.39673200  | -1.93692400 | 2.21703200  |
|            | B | -1.23212500 | 0.30985600  | 2.26148900  |
|            | B | 1.27093200  | 2.94107700  | -0.46108200 |
|            | B | 3.15380600  | -0.21909100 | -1.20293500 |
|            | B | 1.23337100  | -0.31251000 | 2.26145200  |
|            | B | -0.18371600 | -0.75279900 | 3.16583300  |
|            | B | 0.54275100  | 3.00447100  | 1.14796400  |
|            | B | 3.76612500  | 1.26510000  | -0.75313200 |
|            | B | 2.59165500  | -0.05944900 | 1.48482100  |

|             |   |             |             |             |
|-------------|---|-------------|-------------|-------------|
|             | B | 1.13849900  | -3.11549100 | 1.24357900  |
|             | B | 3.30930000  | -1.33233300 | 0.28412400  |
|             | B | -1.85534900 | 1.51760200  | 1.36470700  |
|             | B | -1.13876900 | 3.11372900  | 1.24639600  |
|             | B | -0.41177100 | 3.01961900  | -0.27070800 |
|             | B | 0.13876300  | -1.36349800 | -2.46416700 |
|             | B | -0.78195900 | -0.07901000 | -3.05053900 |
|             | B | -3.76606700 | -1.26345200 | -0.75358800 |
|             | B | -2.92549000 | -2.56713800 | -0.42164300 |
|             | B | -0.28258000 | -2.74717300 | -1.74252100 |
|             | B | -2.12203900 | -2.84544400 | 0.95718000  |
|             | B | -4.01634100 | -0.08925000 | 0.39490400  |
|             | B | -0.13822700 | 1.36545900  | -2.46322000 |
|             | B | 1.89294000  | -0.73290000 | -2.19853800 |
|             | B | -1.27159700 | -2.93945800 | -0.46303900 |
|             | B | -3.07801300 | -1.43215400 | 0.79127300  |
|             | B | -1.89133800 | 0.73340600  | -2.19621800 |
|             | B | 0.78281000  | 0.08129000  | -3.05069400 |
|             | B | 0.41052700  | -3.01939000 | -0.27289900 |
|             | B | 1.26626600  | -2.27367400 | -1.51886100 |
|             | B | -3.30930800 | 1.33278600  | 0.28566300  |
|             | B | -2.82418700 | 1.80332900  | -1.29222600 |
|             | B | -3.15815500 | 0.22135800  | -1.20524600 |
|             | B | -1.26721300 | 2.27592500  | -1.51870200 |
|             | B | -2.59119300 | 0.05799000  | 1.48588600  |
|             | B | -0.54286100 | -3.00580800 | 1.14626200  |
|             | B | 2.82420700  | -1.80332000 | -1.29288900 |
|             | B | 0.28169900  | 2.74964900  | -1.74069900 |
|             | B | 3.07792400  | 1.43202300  | 0.79190800  |
|             | B | 2.92528100  | 2.56779000  | -0.42043600 |
|             | B | 2.20735700  | -2.65218400 | 0.06008700  |
|             | B | -2.20809700 | 2.65172600  | 0.06285900  |
| <b>XXVI</b> | B | -0.49811600 | -2.13134700 | -0.90421600 |
|             | B | 1.14159700  | -1.81267800 | -0.73481300 |
|             | B | -2.12395700 | -2.34107700 | -0.80162900 |
|             | B | -3.13648400 | -0.99333800 | -0.68870300 |
|             | B | 0.15586200  | -0.52176300 | -1.03997400 |
|             | B | -2.47595900 | 0.46928700  | -0.80582300 |
|             | B | 2.43912200  | 1.17887100  | -0.75622600 |
|             | B | -0.85090400 | 0.76637500  | -1.07411900 |
|             | B | 4.02616500  | 1.36209800  | -0.15532900 |
|             | B | 1.80829700  | -0.30207900 | -0.86646900 |
|             | B | 5.78877400  | -1.18911000 | 0.66209100  |
|             | B | 4.32183300  | -1.45935600 | -0.04365600 |
|             | B | 2.75930100  | -1.65473200 | -0.35426500 |
|             | B | 6.50387600  | 0.37069300  | 0.93916300  |
|             | B | 5.06143400  | 0.14759100  | -0.01590500 |
|             | B | 5.54015500  | 1.63564100  | 0.59125800  |
|             | B | -1.80433200 | 1.98028200  | -0.52627100 |
|             | B | -3.37124100 | 1.78998000  | -0.03896900 |
|             | B | -0.20219900 | 2.32018400  | -0.83116600 |

|              |   |             |             |             |
|--------------|---|-------------|-------------|-------------|
|              | B | 1.43124200  | 2.55674500  | -0.79459100 |
|              | B | 3.05594000  | 2.69445600  | -0.39602500 |
|              | B | 4.62686500  | 2.97819200  | 0.34755500  |
|              | B | 5.19072500  | -2.78952900 | 0.65055800  |
|              | B | 3.69420100  | -3.01567200 | -0.04134000 |
|              | B | 2.11539500  | -3.24988900 | -0.24989200 |
|              | B | 0.51985300  | -3.44870700 | -0.48275900 |
|              | B | -1.07932700 | -3.60508200 | -0.39224200 |
|              | B | -2.66704000 | -3.88421500 | -0.06546400 |
|              | B | -4.68879500 | -1.20487700 | -0.04212100 |
|              | B | -3.71864300 | -2.51863100 | -0.31456000 |
|              | B | 3.54815800  | 4.10679900  | 0.35364500  |
|              | B | 2.01530600  | 4.02459400  | -0.01813700 |
|              | B | 0.40949800  | 3.76512300  | -0.25888000 |
|              | B | -1.19592100 | 3.63098100  | -0.20912600 |
|              | B | -2.75535900 | 3.34695300  | 0.05387700  |
|              | B | -5.67829500 | 0.04547800  | 0.29046200  |
|              | B | -4.90943900 | 1.50766100  | 0.40915400  |
|              | B | -4.36703800 | 3.10721700  | 0.34729700  |
|              | B | 6.62046700  | -2.43258700 | 1.31232300  |
|              | B | 7.24960200  | -0.99816500 | 1.38254300  |
|              | B | -6.46158100 | 1.36691500  | 1.20359100  |
|              | B | -5.82510200 | 2.79972000  | 0.91872200  |
|              | B | -4.15055200 | -3.96924500 | 0.42170300  |
|              | B | -5.18212400 | -2.80536000 | 0.55905800  |
|              | B | -6.08354100 | -1.45377500 | 0.94124700  |
|              | B | -6.79771900 | -0.17062200 | 1.51842100  |
| <b>XXVII</b> | B | -0.13466400 | -2.23627500 | -0.65196100 |
|              | B | 1.48402700  | -1.99067100 | -0.70453300 |
|              | B | -1.77451100 | -2.44337500 | -0.66535400 |
|              | B | -2.79293100 | -1.12183400 | -0.69810800 |
|              | B | 0.46878200  | -0.67007300 | -0.81652700 |
|              | B | -2.08990500 | 0.41072600  | -0.55995600 |
|              | B | 2.79274600  | 1.12183000  | -0.69780500 |
|              | B | -0.46882700 | 0.67018100  | -0.81659500 |
|              | B | 4.27210700  | 1.25016000  | 0.15190900  |
|              | B | 2.08989400  | -0.41074000 | -0.55982000 |
|              | B | 6.22241400  | -1.43973500 | 0.73536200  |
|              | B | 4.81650900  | -1.57586600 | -0.39242700 |
|              | B | 3.10089200  | -1.85399300 | -0.40700000 |
|              | B | 6.66537100  | 0.07471100  | 1.06486200  |
|              | B | 5.12545800  | -0.12524100 | 0.49862400  |
|              | B | 5.78206100  | 1.38123500  | 0.97338000  |
|              | B | -1.48432400 | 1.99084300  | -0.70532400 |
|              | B | -3.10102900 | 1.85399800  | -0.40709600 |
|              | B | 0.13435400  | 2.23639900  | -0.65193800 |
|              | B | 1.77437600  | 2.44336000  | -0.66491900 |
|              | B | 3.17566600  | 2.44513200  | 0.33919400  |
|              | B | 4.75269800  | 2.70538200  | 0.97960000  |
|              | B | 5.45106400  | -2.81375700 | 0.57077600  |
|              | B | 4.03515400  | -3.24477400 | -0.01507800 |

|  |   |             |             |             |
|--|---|-------------|-------------|-------------|
|  | B | 2.49610000  | -3.40640200 | -0.39976900 |
|  | B | 0.85354300  | -3.63827400 | -0.42149500 |
|  | B | -0.72906000 | -3.76242900 | -0.28386000 |
|  | B | -2.25564200 | -3.87964500 | 0.32540000  |
|  | B | -4.27196100 | -1.25012900 | 0.15214400  |
|  | B | -3.17554100 | -2.44518400 | 0.33900700  |
|  | B | 3.70772300  | 3.89005000  | 0.93131700  |
|  | B | 2.25572700  | 3.87957800  | 0.32568800  |
|  | B | 0.72901700  | 3.76225600  | -0.28321800 |
|  | B | -0.85365100 | 3.63827800  | -0.42144200 |
|  | B | -2.49624800 | 3.40646100  | -0.40002900 |
|  | B | -5.12531600 | 0.12526800  | 0.49877500  |
|  | B | -4.81663300 | 1.57579000  | -0.39254700 |
|  | B | -4.03526900 | 3.24482400  | -0.01527600 |
|  | B | -6.22233500 | 1.43968700  | 0.73557900  |
|  | B | -5.45103300 | 2.81371200  | 0.57076000  |
|  | B | -3.70745800 | -3.89005800 | 0.93143200  |
|  | B | -4.75239800 | -2.70544400 | 0.97985000  |
|  | B | -5.78176600 | -1.38121600 | 0.97373900  |
|  | B | -6.66511200 | -0.07474200 | 1.06531800  |
|  | B | -3.79472700 | 0.27060700  | -0.55537000 |
|  | B | 3.79466000  | -0.27061000 | -0.55526800 |
